# Supplementary material for: The impact of the built environment on health across the life course: design of a cross-sectional data linkage study
Source: PubMed Central journal article supplement — BMJ Open. 2013 Jan 13;3(1):e002482. doi: 10.1136/bmjopen-2012-002482 (PMC3549251; doi:10.1136/bmjopen-2012-002482), 2013-01-13
Supplement: bmjopen-2012-002482.draft_revisions.pdf [file bmjopen-2012-002482.draft_revisions.pdf]

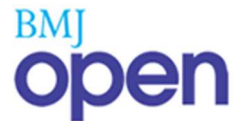

**The Impact of the Built Environment on Health across the Life Course: Design of a Cross-sectional Data Linkage Study**

|                                 |                                                                                                                                                                                                                                                                                                                                                                                                                                                                                                                                                                                                                                                                                                                                                                                                                                                                                                                                                                                                                                                                                                                                                                                                                                                                                                                                                                                                                                                                                                                                                                                                                                                                                                                                                                                                     |
|---------------------------------|-----------------------------------------------------------------------------------------------------------------------------------------------------------------------------------------------------------------------------------------------------------------------------------------------------------------------------------------------------------------------------------------------------------------------------------------------------------------------------------------------------------------------------------------------------------------------------------------------------------------------------------------------------------------------------------------------------------------------------------------------------------------------------------------------------------------------------------------------------------------------------------------------------------------------------------------------------------------------------------------------------------------------------------------------------------------------------------------------------------------------------------------------------------------------------------------------------------------------------------------------------------------------------------------------------------------------------------------------------------------------------------------------------------------------------------------------------------------------------------------------------------------------------------------------------------------------------------------------------------------------------------------------------------------------------------------------------------------------------------------------------------------------------------------------------|
| Journal:                        | <i>BMJ Open</i>                                                                                                                                                                                                                                                                                                                                                                                                                                                                                                                                                                                                                                                                                                                                                                                                                                                                                                                                                                                                                                                                                                                                                                                                                                                                                                                                                                                                                                                                                                                                                                                                                                                                                                                                                                                     |
| Manuscript ID:                  | bmjopen-2012-002482                                                                                                                                                                                                                                                                                                                                                                                                                                                                                                                                                                                                                                                                                                                                                                                                                                                                                                                                                                                                                                                                                                                                                                                                                                                                                                                                                                                                                                                                                                                                                                                                                                                                                                                                                                                 |
| Article Type:                   | Protocol                                                                                                                                                                                                                                                                                                                                                                                                                                                                                                                                                                                                                                                                                                                                                                                                                                                                                                                                                                                                                                                                                                                                                                                                                                                                                                                                                                                                                                                                                                                                                                                                                                                                                                                                                                                            |
| Date Submitted by the Author:   | 11-Dec-2012                                                                                                                                                                                                                                                                                                                                                                                                                                                                                                                                                                                                                                                                                                                                                                                                                                                                                                                                                                                                                                                                                                                                                                                                                                                                                                                                                                                                                                                                                                                                                                                                                                                                                                                                                                                         |
| Complete List of Authors:       | Villanueva, Karen; The University of Western Australia, Centre for the Built Environment and Health, School of Population Health<br>Pereira, Gavin; Yale University, Yale School of Public Health, Center for Perinatal, Pediatric and Environmental Epidemiology<br>Knuiman, Matthew; The University of Western Australia, School of Population Health<br>Bull, Fiona; The University of Western Australia, Centre for the Built Environment and Health, School of Population Health<br>Wood, Lisa; The University of Western Australia, Centre for the Built Environment and Health, School of Population Health<br>Christian, Hayley; The University of Western Australia, Centre for the Built Environment and Health, School of Population Health<br>Foster, Sarah; The University of Western Australia, Centre for the Built Environment and Health, School of Population Health<br>Boruff, Bryan; The University of Western Australia, School of Earth and Geographical Sciences<br>Beesley, Bridget; The University of Western Australia, Centre for the Built Environment and Health, School of Population Health<br>Hickey, Sharyn; The University of Western Australia, Centre for the Built Environment and Health, School of Population Health<br>Joyce, Sarah; Department of Health of Western Australia, Epidemiology Branch<br>Nathan, Andrea; The University of Western Australia, Centre for the Built Environment and Health, School of Population Health<br>Saarloos, Dick; The University of Western Australia, Centre for the Built Environment and Health, School of Population Health<br>Giles-Corti, Billie; University of Melbourne, McCaughey Centre, VicHealth Centre for the Promotion of Mental Health and Community Wellbeing, Melbourne School of Population Health |
| <b>Primary Subject Heading</b>: | Public health                                                                                                                                                                                                                                                                                                                                                                                                                                                                                                                                                                                                                                                                                                                                                                                                                                                                                                                                                                                                                                                                                                                                                                                                                                                                                                                                                                                                                                                                                                                                                                                                                                                                                                                                                                                       |
| Secondary Subject Heading:      | Mental health                                                                                                                                                                                                                                                                                                                                                                                                                                                                                                                                                                                                                                                                                                                                                                                                                                                                                                                                                                                                                                                                                                                                                                                                                                                                                                                                                                                                                                                                                                                                                                                                                                                                                                                                                                                       |
| Keywords:                       | MENTAL HEALTH, PREVENTIVE MEDICINE, PUBLIC HEALTH, SOCIAL MEDICINE                                                                                                                                                                                                                                                                                                                                                                                                                                                                                                                                                                                                                                                                                                                                                                                                                                                                                                                                                                                                                                                                                                                                                                                                                                                                                                                                                                                                                                                                                                                                                                                                                                                                                                                                  |
|                                 |                                                                                                                                                                                                                                                                                                                                                                                                                                                                                                                                                                                                                                                                                                                                                                                                                                                                                                                                                                                                                                                                                                                                                                                                                                                                                                                                                                                                                                                                                                                                                                                                                                                                                                                                                                                                     |

1  
2  
3  
4  
5  
6  
7  
8  
9  
10  
11  
12  
13  
14  
15  
16  
17  
18  
19  
20  
21  
22  
23  
24  
25  
26  
27  
28  
29  
30  
31  
32  
33  
34  
35  
36  
37  
38  
39  
40  
41  
42  
43  
44  
45  
46  
47  
48  
49  
50  
51  
52  
53  
54  
55  
56  
57  
58  
59  
60

SCHOLARONE™  
Manuscripts

For peer review only

# The Impact of the Built Environment on Health across the Life Course: Design of a Cross-sectional Data Linkage Study

## Authors (in order)

Karen Villanueva\*<sup>1</sup>, Gavin Pereira<sup>2,1</sup>, Matthew Knuiiman<sup>3</sup>, Fiona Bull<sup>1</sup>, Lisa Wood<sup>1</sup>, Hayley Christian<sup>1</sup>, Sarah Foster<sup>1</sup>, Bryan J Boruff<sup>4</sup>, Bridget Beesley<sup>1</sup>, Sharyn Hickey<sup>1</sup>, Sarah Joyce<sup>5</sup>, Andrea Nathan<sup>1</sup>, Dick Saarloos<sup>1</sup>, Billie Giles-Corti<sup>6</sup>

## Corresponding author\*

**Karen Villanueva**; Centre for the Built Environment and Health, School of Population Health (M707), The University of Western Australia, 35 Stirling Highway, Crawley, WESTERN AUSTRALIA, AUSTRALIA; Phone: +61 8 6488 1306; Fax: +61 8 6488 1199; E-mail: [karen.villanueva@uwa.edu.au](mailto:karen.villanueva@uwa.edu.au)

## Author affiliations

<sup>1</sup> **Centre for the Built Environment and Health, School of Population Health, The University of Western Australia, 35 Stirling Highway, Crawley, WESTERN AUSTRALIA, AUSTRALIA 6009.**

<sup>2</sup>, previously <sup>1</sup> **Yale School of Public Health, Center for Perinatal, Pediatric and Environmental Epidemiology, Yale University, 60 College Street, New Haven, CT, 06510 USA.**

<sup>3</sup> **School of Population Health, The University of Western Australia, 35 Stirling Highway, Crawley, WESTERN AUSTRALIA, AUSTRALIA 6009.**

<sup>4</sup> **School of Earth and Geographical Sciences, The University of Western Australia, 35 Stirling Highway, Crawley WESTERN AUSTRALIA, AUSTRALIA 6009.**

<sup>5</sup> **Department of Health of Western Australia, Epidemiology Branch 189 Royal Street, East Perth WESTERN AUSTRALIA, AUSTRALIA 6004.**

<sup>6</sup> **McCaughey Centre, VicHealth Centre for the Promotion of Mental Health and Community Wellbeing, Melbourne School of Population Health, University of Melbourne<sup>6</sup>, Level 5, 207 Bouverie Street, Melbourne VICTORIA, AUSTRALIA 3010.**

## Keywords

Life stages, health, mental health, data linkage, built environment

## Word Count

3,484 words

## ABSTRACT

### Introduction

The built environment is increasingly recognised as being associated with health outcomes. Relationships between the built environment and health differ among age groups, especially between children and adults, but also between younger, mid-age and older adults. Yet few address differences across life stage groups within a single population study. Moreover, existing research mostly focuses on physical activity behaviours, with few studying *objective* clinical and mental health outcomes. The Life Course Built Environment and Health (LCBEH) project explores the impact of the built environment on self-reported and objectively-measured health outcomes in a random sample of people across the life course.

### Methods and analysis

This cross-sectional data linkage study involves 15,954 children (0-15 years), young adults (16-24 years), adults (25-64 years), and older adults (65+ years) from the Perth metropolitan region who completed the Health and Wellbeing Surveillance System survey administered by the Department of Health of Western Australia from 2003 to 2009. Survey data were linked to WA Hospital Morbidity Database System (hospital admission) and Mental Health Information System (mental health system outpatient) data. Participants' residential address was geocoded and features of their 'neighbourhood' measured using Geographic Information Systems software. Associations between the built environment and self-reported and clinical health outcomes will be explored across varying geographic scales and life stages.

### Ethics and dissemination

The University of Western Australia's Human Research Ethics Committee and the Department of Health of Western Australia approved the study protocol (#2010/1). Findings will be published in peer-reviewed journals and presented at local, national and international conferences, thus contributing to the evidence base informing the design of healthy neighbourhoods for all residents.

## ARTICLE SUMMARY

### Article focus

- Describes the design and methods for a cross-sectional data linkage study that explores the impact of the built environment (i.e., neighbourhood design) on self-reported and clinical health outcomes of children, young adults, adults and older adults.

### Key messages

- Exploring the impact of the built environment on health outcomes across life stage groups within a single population is yet to be explored.
- Comparisons across various life stages are required to build an evidence base for designing healthy neighbourhoods that cater for children through to older adults.
- This study will explore variations in relationships between the built environment, health behaviours, and objectively-measured health outcomes *within* and *across* different life stages for a large study population.

### Strengths and limitations

- Data linkage of built environment measures to both self-reported health behaviours and objectively-measured health outcomes builds a stronger case for changing neighbourhood design conducive to healthy living.
- Using the same data to examine associations *within* and *across* different life stages is valuable, allowing for consistency in comparisons across life stages.
- Data linkage of available existing data is cost-effective as it includes a variety of data sources for a large sample size representative of the population.
- Using existing data is limited in that the researcher is restricted to pre-constructed measures that may not be specific for the outcome/s of interest.

## INTRODUCTION

In the last decade, there has been growing interest in the impact of the built environment on health. Indeed, there is growing evidence that the built environment directly or indirectly encourages active lifestyles, influencing people's physical, mental, and social health and wellbeing [1-3].

The majority of studies exploring built environment and health associations examine physical activity outcomes (e.g., walking, cycling, and recreational physical activity). From a physical activity perspective, the built environment is often conceptualised in terms of its 'walkability', a composite index combining a number of neighbourhood design attributes representing the degree of pedestrian-friendliness [4]. Evidence to date suggests that adults living in more walkable neighbourhoods (i.e., higher residential density with mixed land use and connected street networks) have higher levels of transport-related walking, overall physical activity, and a lower body mass index than those in less walkable neighbourhoods [5, 6]. Other built environment features also appear to be important for health, such as the distribution, accessibility, aesthetics and quality of destinations, including public open space [7-9], the presence of greenery [10, 11], and perceived safety [12, 13].

While the relationship between the built environment and physical activity is gaining momentum, the potential impact of the built environment across a range of other health outcomes is yet to be fully explored. For example, it is widely acknowledged that physical activity is a major modifiable risk factor in the reduction of morbidity and mortality from major chronic diseases such as cardiovascular disease [14], type II diabetes [15, 16], osteoporosis [17], some forms of cancers [18, 19], and is important for mental and social wellbeing [20, 21]. Studies that have explored other physical and mental health outcomes generally use self-reported general indicators from health surveillance systems [22-24]. Examination of objectively-measured health outcomes is greatly improved by linkage of questionnaire responses and environmental attributes to medical records which is rarely available. A Canadian study utilised hospital and physician data to conduct a geographical analysis of Type II diabetes and found a positive association between Type II diabetes prevalence and areas with vacant and placard houses and crime [24]. Conversely, living in walkable areas with green spaces in a densely populated city was found to be positively associated with longevity of older adults living in urban areas [25]. Thus it is important that future research on the effect of the built environment on health outcomes also includes objectively-measured health outcomes [26] to build a stronger case for designing healthy neighbourhoods.

Although research supporting the relationship between the built environment and health behaviours is accumulating, there are gaps in the evidence. For example, children, adolescents, adults, and older adults are likely to react differently to changes in neighbourhood design and interventions aimed at creating more health supportive environments [27]. Indeed, previous research suggests that there are differences in built environment associations observed at different life stages [28, 29]. For example, more walkable neighbourhoods support walking in adults, however walkable neighbourhoods often have more traffic due to better street connectivity, and exposure to traffic is negatively associated with walking and cycling in children and older adults [30-32]. However, variability in the health behaviour of different life stage groups under the influence of built environment factors is rarely addressed within the scope of a single study. Commonly, studies focus on a particular age group (often adults and increasingly children and older adults), or account for variability by adjusting for age and other socio-demographic factors that are likely to cause differences in the outcomes [28]. This may miss findings relevant to specific life stages. Hence, efforts to change the built environment to enhance health supporting behaviours and influence health outcomes may produce inconsistent results for some population groups, unless variations in responses to the built environment are considered. Thus, studies exploring the effect of the built environment on health across the life course are required.

Methodological issues also require greater exploration across the life course in studying the impact of the built environment, the size and definition of the built environment's area of influence (i.e., the 'neighbourhood') may differ for different population sub-groups [33]. Moreover, the distance over

1  
2  
3 which the built environment is measured may vary for different health behaviours and outcomes.  
4 Typically, distances of 400m-1600m around individuals' homes are used to represent the local  
5 'neighbourhood' [33]. However, the importance of geographic scale is relatively understudied. There  
6 appears to be no published studies [34] exploring the impact of geographic scale by age group or life  
7 stage, although it is recognised that the impact of neighbourhood size is likely to vary for children  
8 [35] as well as for older adults [36] compared with adults.  
9

10 Investigation of the association between the built environment and health behaviour and health  
11 outcomes across the life course would address inconsistencies in the evidence base to date.  
12 Comparing the impact of different built environment measures across various life stages is required to  
13 help develop a consistent evidence-base designed to inform policy and practice about how  
14 neighbourhood design can be optimized to meet the health needs of *all* its residents. The Life Course  
15 Built Environment and Health (LCBEH) project attempts to address some of these gaps by linking  
16 objective built environment measures with self-reported and objectively-measured health data of  
17 representative samples at different life stages. This paper describes the design and methods for the  
18 LCBEH project.  
19

## 20 21 22 **METHODS**

### 23 24 **Study rationale, context and design**

25  
26 The LCBEH study was conceptualised using the theoretical framework outlined in Figure 1.  
27 Specifically, the goal was to assemble data that would permit the examination of associations between  
28 the built environment and: 1) behavioural and protective behaviours (e.g., physical activity, nutrition,  
29 sedentary behaviour); 2) self-reported health status (e.g., weight status, physical health, injuries,  
30 chronic conditions, mental health); and 3) objectively-measured health outcomes (e.g., cardiovascular  
31 events, respiratory problems, anxiety, depression, mental health) for children, young adults, adults,  
32 and older adults (Figure 1).  
33

34  
35 The opportunity to assemble such a dataset was provided by the ongoing Health and Wellbeing  
36 Surveillance System (HWSS) cross-sectional survey (herein referred to as 'survey') administered by  
37 the Department of Health of Western Australia which continuously surveyed Western Australians in  
38 four age groups (children 0 to 15 years, young adults 16-24 years, adults 25-64 years, and older adults  
39 65+ years) and in which respondents were asked to provide permission to link their survey data to  
40 other databases. Parents provided answers for children aged 0-15 years. Western Australia's(WA)  
41 comprehensive data linkage system (i.e., the WA Data Linkage System) systematically links available  
42 administrative health data within WA by matching patient names and other identifiers [37]. Data  
43 systems routinely included in the linked system include the Hospital Morbidity Database System  
44 (HMDS), and the Mental Health Information System (MHIS). With appropriate approvals and under  
45 specified conditions, external survey cohorts may also be linked to the system in order to access  
46 linked health data and provision has been made to link environmental data through geocoded  
47 residential addresses of survey participants.  
48

49 *Insert Figure 1 here*

50  
51 The LCBEH project is a cross-sectional linked data study involving people in four life stages from the  
52 Perth metropolitan region who completed the survey and who provided consent to link their data to  
53 other data sources. The survey was administered to a stratified random sample of the population from  
54 2003 to 2009 and conducted by the Department of Health of Western Australia. Linked data from the  
55 Hospital Morbidity Database System and Mental Health Information System were obtained for this  
56 project. To enable linking of built environment and health data the study was limited to the Perth  
57 metropolitan region. Perth is the capital city of Western Australia with an urban population of  
58 approximately 1.7 million, which is 75% of the state [38]. It is one of the smaller, yet fastest growing  
59  
60

Australian capital cities. Perth is isolated, sprawls some 170km along the coast, and has a relatively high standard of living with a Mediterranean climate. The sources of data used in this project are described in Figure 2.

Between 2003 and 2009, a total of 21,347 (3,668 children; 2,175 young adults; 10,821 adults, and 4,683 older adults) respondents from metropolitan Perth took part in the survey. Of those participants, 2,964 children (80.8%), 1,584 young adults (73.2%), 7,795 adults (72.0%), and 3,611 older adults (77.1%) granted permission for data linkage and had a geocoded home address (total 15,954; 74.7%).

### Data sources

*Insert Figure 2 here*

#### Health and Wellbeing Surveillance System (HWSS) survey

The HWSS survey is a continuous data collection system administered by the Department of Health of Western Australia. It collects self-reported health, wellbeing and lifestyle information from WA residents of all ages via computer-assisted telephone interviews (Table 1) (n=1,959,088; 2006 Census) [39]. Every month, at least 550 people throughout WA are interviewed after being randomly selected from the latest version of the phone directory [39]. The response rate (completed interviews / eligible contacts) ranged from 77-88% over the study period, with a participation rate (completed interviews / completed interviews + refusals) between 82-92%. The consistently high response and participation rates promote confidence that estimates from the HWSS are reliable and representative of the population.

**Table 1. Summary of survey variables from the Health and Wellbeing Surveillance System**

| Category                     | Types of information available                                                                                                                                                                                 |
|------------------------------|----------------------------------------------------------------------------------------------------------------------------------------------------------------------------------------------------------------|
| Socio-demographic            | Age, gender, country of birth, education level, marital status, employment status, household income, family structure, living arrangements, housing tenure, concessions (health care card, government pension) |
| General health status        | Physical and mental functioning                                                                                                                                                                                |
| Chronic conditions           | Arthritis, heart disease, stroke, cancer, osteoporosis, diabetes, asthma, respiratory problems                                                                                                                 |
| Injuries                     | Falls                                                                                                                                                                                                          |
| Mental health                | Anxiety, depression, stress-related problem, psychological distress, lack of control over personal life and health, trouble with emotions, need help and/treatment for an emotional problem                    |
| Psychosocial events          | Moved house, robbed, death of someone close, marriage breakdown, serious injury, serious illness, loss of driver's license, financial hardship                                                                 |
| Risk factors                 | Body Mass Index, sedentary activity (screen time), alcohol intake, smoking status, high cholesterol, high blood pressure                                                                                       |
| Physical activity behaviours | Walking, Vigorous activity, Moderate activity                                                                                                                                                                  |
| Protective factors           | Nutrition, social capital (group membership)                                                                                                                                                                   |
| Child development            | Birth weight, months spent breast feeding, age when liquids, water, and solids were introduced, parent thinks child was late in starting to talk, parent thinks child needed professional help with speech.    |
| Child information            | Days absent from school, looks forward to school, progress at school, bullied by other children, bullies other children, has a special friend, has a group of friends,                                         |
| Family functioning           | Family gets along well, planning activities as a family is difficult, avoid                                                                                                                                    |



---

discussing topics, making decisions is usually a problem in the family

---

## Hospital Morbidity Data System (HMDS) and Mental Health Information System (MHIS) data

The HMDS and MHIS data provides a comprehensive set of objectively-measured clinical health data. The HMDS (herein referred to as ‘hospital’ data) contains inpatient discharge summary data from all public and private hospitals in WA [40]. The MHIS (herein referred to as ‘mental health system’ data) contains outpatient and emergency health contact information. For each consenting survey participant we obtained dates and principal diagnosis codes for all linked hospital and mental health system records in a three-year period centred on the calendar year in which they participated in the survey. The primary variables for the LCBEH project are the counts of hospital admissions (in the three-year period) with a primary diagnosis representing 13 clinical health conditions. Similarly, the mental health system records in the three-year period were used to define mental health conditions. Table 2 summarises each clinical health condition and classification according to the International Classification of Diseases ICD-10 [41]. A total of 11,308 (53.0%) participants had a linked hospital record and 695 (3.2%) had a linked mental health system record within the three-year window.

**Table 2. Summary of clinical health outcomes for patients with primary diagnosis**

| Source      | Outcome                     | ICD 10              |
|-------------|-----------------------------|---------------------|
| HMDS        | Arthritis                   | M000-25             |
| HMDS        | Coronary heart disease      | I20-25              |
| HMDS        | Cerebrovascular disease     | I60-68              |
| HMDS        | Cancer                      | D000-48; Z00-02     |
| HMDS        | Osteoporosis                | M80-82              |
| HMDS        | High cholesterol            | E78                 |
| HMDS        | High blood pressure         | I10-13; I15         |
| HMDS        | Diabetes                    | E10-14              |
| HMDS        | Asthma                      | J45-46              |
| HMDS        | Other respiratory diseases* | J, excluding J45-46 |
| HMDS & MHIS | Anxiety or stress           | F40-99              |
| HMDS & MHIS | Self-harm                   | X60-84              |
| HMDS & MHIS | Depression                  | F30-39              |

HMDS: Hospital Morbidity Data System (inpatient information); MHIS: Mental Health Information System (outpatient and emergency information); ICD: International Classification of Diseases [41].

\*Other respiratory diseases: relates to respiratory diseases other than asthma.

## Built Environment and Destinations Data

For survey participants who gave permission for linkage to other datasets (n=15,954), built environment and (accessible) destinations data were calculated. The list of geocoded home addresses was provided by the WA Department to Health Epidemiology Branch to the Centre for Built Environment and Health (CBEH) at The University of Western Australia (UWA) and specific built environment and destinations variables calculated for each geocoded address. To protect the identity of study participants, the built environment and destinations variables were returned to the WA Department to Health Epidemiology Branch which linked these data to survey, hospital, and mental health system data and returned a (de-identified) file to CBEH.

The Centre for the Built Environment and Health (CBEH) at The University of Western Australia (UWA) has a comprehensive Geographic Information Systems (GIS) built environment and destinations data platform, an objectively-measured source of built environment features for each

1  
2  
3 participant. Built environment and destinations measures that are likely to influence health behaviour and  
4 health outcomes were chosen based on the literature. To examine the association between built  
5 environment features and health outcomes of interest, it was necessary to first define a spatial unit that  
6 best represents the participant's local environment or 'neighbourhood' [42]. Service areas (i.e., the area  
7 that is accessible via the road network up to a specified distance from a participant's home) are typically  
8 used to represent an individual's 'neighbourhood' environment [42]. For this project, environment variables  
9 at geographic scales ranging from 200m to 1600m distances were calculated. A 1600m service area is  
10 typically used in studies with adults, as this represents how far they could walk from home at moderate to  
11 vigorous intensity within 15 minutes, which is half of the recommended level of daily physical activity for  
12 adults [43]. However, as mentioned earlier, the impact of neighbourhood size is likely to vary depending on  
13 the age of the participant e.g., 'neighbourhood' size may be smaller for children and older adults, compared  
14 with an able-bodied adolescent or adult [33]. Indeed, previous research suggests that a walkable distance  
15 for children could range between 250 to 1600 metres [31, 44, 45].  
16

17 A series of scripts were developed by the Centre's GIS team to compute the GIS environment measures  
18 using PYTHON v2.6 [46], a scripting software compatible with ArcGIS v10. Moreover, distance to  
19 destinations within 10km of each participant's home was computed. Count of, and closest road network and  
20 Euclidean (as 'crow flies') distance to destinations within 10km of each participant's home were computed  
21 using a script based on the Origin-Destination (OD) Cost Matrix tool in ArcGIS v10. Destination types were  
22 obtained from a variety of sources. Table 3 describes the environment variables that were computed at  
23 200m, 400m, 800m, and 1600m service areas around participants' homes. Table 4 describes the type of  
24 destination, source of destination information, and years for which destinations information were obtained.  
25 Intensive processing was required to derive each environment measure at 200m, 400m, 800m, and 1600m  
26 service areas, and distance to each destination within 10km around participants' home addresses.  
27  
28  
29  
30  
31  
32  
33  
34  
35  
36  
37  
38  
39  
40  
41  
42  
43  
44  
45  
46  
47  
48  
49  
50  
51  
52  
53  
54  
55  
56  
57  
58  
59  
60

**Table 3. Built environment measures computed for Life Course Built Environment and Health participants**

| Environment measure                     | Description                                                                                                                                                                                                                                                                                                                                                                                     | Core input data <sup>#</sup> and sources used                                                                             | Processing required                                                                                                                                                                                                                                                                                                                                                                                     | Main output/s computed                                                                                                                                                                                                      |
|-----------------------------------------|-------------------------------------------------------------------------------------------------------------------------------------------------------------------------------------------------------------------------------------------------------------------------------------------------------------------------------------------------------------------------------------------------|---------------------------------------------------------------------------------------------------------------------------|---------------------------------------------------------------------------------------------------------------------------------------------------------------------------------------------------------------------------------------------------------------------------------------------------------------------------------------------------------------------------------------------------------|-----------------------------------------------------------------------------------------------------------------------------------------------------------------------------------------------------------------------------|
| Land use mix (Transport and Recreation) | Measures the diversity (or mix) and distribution of the area of destinations/land use classes of interest (e.g., recreation vs. transport land uses) against each other within a participant's service area. The creation of two land use mix measures reflect previous work by Christian and colleagues (2011), which assessed land uses representative of transport and recreational walking. | Service areas, Cadastre, Land tenure information, Reserve Vesting Reports, (VGO points to identify residential features). | Land use classifications were developed from land tenure information (taxation/rating records) and reserve vesting reports. Nine categories of land use classifications were used to calculate two land use mix measures: 1) transport; and 2) recreation. Land use was assigned to cadastral parcels on a mutually exclusive basis (with overlaps eliminated) based on a hierarchy of preference [47]. | Area (square metres) for all nine land use types within a participant's service area. Land-use mix was calculated according to an entropy formula [47], which is a variation of that originally used by Frank et al., 2005. |
| Street connectivity                     | Measures the inter-connectedness of the road (i.e., street) network within a participant's service area.                                                                                                                                                                                                                                                                                        | Road network nodes representing three-way or more intersections, service areas.                                           | Streets with $\geq 3$ intersections were identified using road network data.                                                                                                                                                                                                                                                                                                                            | Count of three (or more) intersections divided by the area (square metres) of the participant's service area.                                                                                                               |
| Road exposure                           | Proxy measure for the level of traffic volume on roads within a participant's service area.                                                                                                                                                                                                                                                                                                     | Road network, Service areas, Functional Road Hierarchy (FRH)* information.                                                | 'Road function' detailing exposure to number of vehicles/day was used as a proxy for traffic volume.                                                                                                                                                                                                                                                                                                    | Total length (metres) of each road type within the service area.                                                                                                                                                            |
| Residential density                     | Measures the density of residential dwellings on residential land within a participant's service area.                                                                                                                                                                                                                                                                                          | Service areas, Cadastre, Land use (VGO points used to identify residential features).                                     | Area of residential land within a service area was estimated by geographically selecting cadastral parcels that intersect VGO points classified as residential features.                                                                                                                                                                                                                                | Number of residential dwellings divided by the area of residential land (square metres) within the participant's service area.                                                                                              |
| Gross density                           | Measures the density of residential dwellings on participant's total service area.                                                                                                                                                                                                                                                                                                              | Service areas, Land use (VGO points used to identify residential features).                                               | Number of residential dwellings was obtained from VGO points classified as residential features.                                                                                                                                                                                                                                                                                                        | Number of residential dwellings divided by the total area of the participant's service area (hectares). Not calculated for 1600m service area.                                                                              |
| Lot density                             | Measures type of dwelling on the participant's residential lot.                                                                                                                                                                                                                                                                                                                                 | Participant's geocoded home address, Cadastre, Land Use (VGO points)                                                      | 'Lot type' was computed using the spatial join tool in ArcGIS v10. Participant's homes that intersected cadastral parcels with                                                                                                                                                                                                                                                                          | Lot type classification (e.g., house, duplex), Zoning information such as zonal code and classification, Residential                                                                                                        |

|                                                 |                                                                                                                                                                                                                                                                         |                                                                                                          |                                                                                                                                                                                                 |                                                                                                                                           |
|-------------------------------------------------|-------------------------------------------------------------------------------------------------------------------------------------------------------------------------------------------------------------------------------------------------------------------------|----------------------------------------------------------------------------------------------------------|-------------------------------------------------------------------------------------------------------------------------------------------------------------------------------------------------|-------------------------------------------------------------------------------------------------------------------------------------------|
|                                                 |                                                                                                                                                                                                                                                                         |                                                                                                          | VGO 'dwelling' information (e.g., house, duplex, apartment) were identified.                                                                                                                    | dwelling (yes, no). 'Lot density' for each participant was determined by a count of 'lot types'.                                          |
| Greenness                                       | Measures the presence of greenness in a neighbourhood                                                                                                                                                                                                                   | Service areas, Normalised Difference Vegetation Index (NDVI) raster layer (25m x 25m cells) <sup>2</sup> | Greenness was calculated using the Extract NDVI tool. Water features were removed before the NDVI values were calculated [11].                                                                  | Minimum, maximum, mean, range, standard deviation, and sum for NDVI values within each participant's service area.                        |
| Slope (terrain)                                 | Measures the on-ground terrain or topography.                                                                                                                                                                                                                           | Service areas, Digital Elevation Model (DEM) for slope (90m x 90m cells) <sup>3</sup>                    | Percentage slope was calculated from a 90m x 90m DEM using a spatial analyst tool, Slope.                                                                                                       | Minimum, maximum, mean, range, standard deviation, and sum for each service area from the slope raster that intersected the road network. |
| Walkability index 1 & 2 (not calculated in GIS) | Measures the 'pedestrian-friendliness' of a neighbourhood i.e., how supportive a neighbourhood is of active living through encouraging walking for transport (for utilitarian reasons such as accessing destinations) or recreation (walking for fitness or enjoyment). | Index is comprised of standard z-scores for street connectivity, land-use mix, and residential density.  | Two walkability indices were created for each participant: 1) Transport walkability index; and 2) Recreational walkability index, based on transport and recreation land use mix measures [47]. | Walkability score (integers)<br>Walkability quartiles                                                                                     |

All environment measures were processed at 200m, 400m, 800m, and 1600m service areas around each consenting participant's home, unless otherwise specified.

Cadastre, Reserve Vesting Reports, VGO points, and Road network data were provided by the Western Australian Land Information Authority.

VGO: Valuer General's Office;

<sup>#</sup>Core input data: Refers to cadastre, road network etc. The years of core input data which best reflects the year the participant completed the survey was used. E.g., GIS core input data for years 2005, 2006, 2008, and 2009 were used for participants completing the survey in four groups respectively: 1) February 2003-June 2005; 2) July 2005-December 2006; 3) January 2007-June 2008; 4) July 2008-December 2009.

<sup>1</sup>Functional Road Hierarchy (FRH): The hierarchy designated the function of all roads in Perth: 1) Access Roads (≤3000 vehicles/day); 2) Local Distributor (≤6000 vehicles/day); 3) District Distributor B (>6000 vehicles/day); 4) District Distributor A (>8000 vehicles/day); 5) Primary Distributor (>15,000 vehicles/day); and 6) Regional Distributor (>100 vehicles/day; connects metropolitan distributors 1-5 to regional areas) [48].

<sup>2</sup>Normalised Difference Vegetation Index (NDVI) layer was derived from annually updated Landsat TM remote sensing imagery. NDVI values ranged from -1 to +1. Values of -1 generally represent water, while values of zero (-0.1 to 0.1) correspond to bare surfaces such as rock, sand, rooftops and roads. Higher values (0.2 to 0.4) represent grassland or bush land and values of +1 represent green vegetation [49].

<sup>3</sup>Digital Elevation Model (DEM) layer for slope was provided by Geoscience Australia [50].

**Table 4. Destination types computed for the Life Course Built Environment and Health study**

| Destination type                                  | Description                                                                                                                                                                                                                       | Source of data                                     | Years of data obtained <sup>±</sup> |
|---------------------------------------------------|-----------------------------------------------------------------------------------------------------------------------------------------------------------------------------------------------------------------------------------|----------------------------------------------------|-------------------------------------|
| Sensis destinations                               | Contains the most comprehensive and current destination data in Perth, WA, mainly of commercial businesses (e.g., retail shops, shopping centres, restaurants, medical centres, recreation venues, libraries, community centres). | Sensis Pty Ltd.                                    | 2004, 2005, 2007, 2010              |
| Schools                                           | Government (public) and non-government (private) schools (all years).                                                                                                                                                             | Department of Planning and Department of Education | 2004, 2005, 2007, 2009              |
| Food outlets                                      | A combination of WADoH data and Sensis food outlet data (e.g., restaurants, cafes, grocery stores). This is the most comprehensive food outlet data layer.                                                                        | Combination of WADoH* and Sensis Pty Ltd.*         | 2008                                |
| Public transport stops                            | Bus stops, train stations, ferry terminals, free city bus stops in the Perth central business district, and school services stops.                                                                                                | Public Transport Authority                         | 2005, 2006, 2008, 2009              |
| Post Office (PO) box locations                    | All post-office boxes.                                                                                                                                                                                                            | Australia Post                                     | 2011                                |
| Crime locations (burglary and non-dwelling)       | Locations where: 1) actual and attempted burglary; or 2) crimes committed against a person in public (e.g., threats, disorderly conduct, assault, robbery), have been reported.                                                   | Western Australian Police Service                  | 2007                                |
| Beaches                                           | Beach access trails (i.e., any trail or path that could be seen to be used as an access point to the beach).                                                                                                                      | CBEH-derived*                                      | 2005                                |
| Parks 2005                                        | Parks (2 acres or more in size) within 1600m of RESIDE study <sup>1</sup> participants.                                                                                                                                           | CBEH-derived*                                      | 2005                                |
| Public Open Space 2010 (green space) <sup>2</sup> | All green public open space in metropolitan Perth, WA. (e.g., parks, natural and conservation areas, degraded or cleared land, school grounds).                                                                                   | CBEH-derived*                                      | 2010                                |

All destination variables were processed up to 10km from consenting participant's homes.

<sup>±</sup>Years of data obtained: The year for which the destination information was obtained. The year closest to the year the participant completed the survey was used.

\*WADoH: Department of Health of Western Australia

\*Sensis Pty Ltd: Food outlet data obtained from the Sensis destinations layer

\*CBEH-derived: Destinations that were manually created by the Centre for the Built Environment and Health (CBEH).

<sup>1</sup>RESIDE study: A five-year longitudinal study conducted by CBEH, which examines the impact of the former Western Australian Government's Department for Planning and Infrastructure's (DPI) urban design code, the Liveable Neighbourhood Guidelines [7]. This project collected attribute information on 1906 parks (2 acres or more in size) in metropolitan Perth using the Public Open Space Tool i.e., POST [51].

<sup>2</sup>Parks: A total of 6505 public open space (green space only) were manually digitised by two PhD students at CBEH. Larger parks (n= 2525) were audited for park attributes (e.g., presence of lighting, playground, sport facilities, water features, shade) by PhD students, and work experience students at CBEH using the Public Open Space Desktop Auditing Tool (POSDAT), which is an adaptation of the previous POST tool used for the RESIDE study. Smaller parks (n=714) were audited using the mini-POSTDAT, a shorter version of the POSTDAT. The POSTDAT is currently unpublished but has been tested for inter-rater reliability.

Assumptions were made regarding the most appropriate year of GIS data sources from which to calculate built environment measures matching participants' year of survey (Table 5). Participants were divided into four groups according to date of survey participation: February 2003 – June 2005 (n=4404), July 2005–December 2006 (n=3896), January 2007–June 2008 (n=3189) or July 2008 – December 2009 (n=4465). Survey data was linked with the most temporally relevant GIS data. That is, the year of GIS data used corresponded as closely as possible to the year the survey was completed by participants. The most temporally relevant destination data was obtained for each participant group, but this was not always possible. Table 5 presents the year of GIS data used for the four groups of survey participants.

**Table 5. Years of environment and destinations data applied to Life Course Built Environment and Health Survey participants**

| Participant group (HWSS <sup>1</sup> survey completion period) | 1 (February 2003- June 2005) | 2 (July 2005- December 2006) | 3 (January 2007- June 2008) | 4 (July 2008- December 2009) |
|----------------------------------------------------------------|------------------------------|------------------------------|-----------------------------|------------------------------|
| <b>Environment variables</b>                                   |                              |                              |                             |                              |
| Land use mix (Transport and Recreation)                        | 2005                         | 2006                         | 2008                        | 2009                         |
| Street connectivity                                            | 2005                         | 2006                         | 2008                        | 2009                         |
| Road exposure                                                  | 2005                         | 2006                         | 2008                        | 2009                         |
| Residential density                                            | 2005                         | 2006                         | 2008                        | 2009                         |
| Gross density                                                  | 2005                         | 2006                         | 2008                        | 2009                         |
| Lot density                                                    | 2005                         | 2006                         | 2008                        | 2009                         |
| Greenness                                                      | 2005                         | 2006                         | 2008                        | 2009                         |
| Slope (terrain)                                                | 2005                         | 2006                         | 2008                        | 2009                         |
| Walkability Index (Transport and Recreation)                   | *                            | *                            | *                           | *                            |
| <b>Destinations variables</b>                                  |                              |                              |                             |                              |
| Sensis destinations                                            | 2004                         | 2005                         | 2007                        | 2010                         |
| Schools                                                        | 2004                         | 2005                         | 2007                        | 2009                         |
| Food outlets                                                   | 2008                         | 2008                         | 2008                        | 2008                         |
| Public transport stops                                         | 2005                         | 2006                         | 2008                        | 2009                         |
| Post Office (PO) Box locations                                 | 2011                         | 2011                         | 2011                        | 2011                         |
| Crime locations (burglary and non-dwelling)                    | 2007                         | 2007                         | 2007                        | 2007                         |
| Beaches                                                        | 2005                         | 2005                         | 2005                        | 2005                         |
| Parks 2005                                                     | 2005                         | 2005                         | 2005                        | 2005                         |
| Public Open Space (green space) 2010                           | 2010                         | 2010                         | 2010                        | 2010                         |

\*Walkability Index was calculated from summing z-scores of land use mix, street connectivity, and residential density

<sup>1</sup>HWSS: Health and Wellbeing Surveillance System Survey

### Data analyses

Using linked data, associations between built environment and destination measures at 200m, 400m, 800m, and/or 1600m and health behaviour and outcomes across the life course will be examined. The survey data will allow opportunities to explore individual, social, and family-environment factors as well as self-reported risk and protective health factors and behaviours (e.g., physical activity, sedentary behaviours, eating behaviours, BMI outlined in Table 1). The availability of hospital and mental health system data for survey participants allows additional analyses of the relationship between the built environment and objectively-measured health status outcomes (e.g., cardiovascular disease, respiratory problems, mental health, and others outlined in Table 2). The health conditions

1  
2  
3 examined will be different across the life stage groups and will focus on common conditions for each  
4 life stage group.

5  
6 With at least 1,500 participants in each life stage, comparisons of factors and outcomes *across* the life  
7 stages will have at least 90% statistical power to detect differences in prevalence of 4% (e.g., 10% vs.  
8 14%) and differences in means as small as 0.12 SD. In analyses *within* life stages, with a total of  
9 1,500 respondents there is more than 90% power to detect a difference in prevalence across tertiles of  
10 7% (e.g., 10% vs. 17%) and a difference in means across tertiles of 0.2 SD. For adults, with 6,000  
11 respondents, there is more than 90% power to detect a difference in prevalence across tertiles of 4%  
12 (e.g., 10% vs. 14%) and a difference in means across tertiles of 0.1 SD.  
13

### 14 15 **Ethics and dissemination**

16  
17  
18 Ethics approval for the project was obtained from The University of Western Australian Human  
19 Research Ethics Committee and the Department of Health of Western Australia's Ethics Committee  
20 (#2010/1). Given the broad and multidisciplinary scope of the project and richness of data that will be  
21 analysed, findings will be of interest to researchers and practitioners from a diverse range disciplines,  
22 including public health, urban planning and design, transportation, human and urban geography. Thus,  
23 results will be widely disseminated at local academic and practitioner oriented seminars, and national  
24 and international conferences. A series of publications in peer-reviewed academic journals across  
25 various disciplines will ensue.  
26

### 27 **DISCUSSION**

28  
29 The last decade has seen a rapid growth in studies on the impact of the built environment on health.  
30 However, little is known about the variability of these relationships for different population sub-  
31 groups and if different built environment features affect different groups across the life course.  
32 Moreover, understanding associations between the built environment and objectively-measured health  
33 outcomes remains largely understudied. The Life Course Built Environment and Health project  
34 attempts to strengthen the existing evidence base related to the nexus between the built environment and  
35 health, and will have important implications for policy and practice.  
36

37  
38 This appears to be one of the first studies to examine objectively-measured built environment measures and  
39 health outcomes, combined with self-reported health behaviour data for different population sub-groups  
40 across the life course. Most evidence to date is based on self-reported health measures, and study just one  
41 population group. Moreover, the LCBEH project will enable examination of the pathways through which  
42 the built environment directly and indirectly impacts health outcomes. Improved understanding of these  
43 issues is needed to inform the design of effective interventions for different life stages, and to assist  
44 planners and policy makers in creating neighbourhoods that are responsive to different population sub-  
45 groups and trends in health and wellbeing.

46  
47 The LCBEH project has a number of strengths. Data linkage of built environment measures to both self-  
48 reported health behaviour data and objectively-measured health outcome data is a strength of this study to  
49 build a stronger case for changes to the built environment that are conducive to healthy living. The other  
50 major strength of this study is that the data are available in one dataset across the life course. Data linkage of  
51 available existing data is cost-effective as it includes a variety of data sources for a large sample size  
52 representative of the population. Moreover, using the same data to examine associations within and across  
53 different life stages is valuable, allowing for consistency in comparisons across life stages and  
54 generalizability across other urban populations living in developed countries. Moreover, built environment  
55 features within different neighbourhood buffer sizes have been measured, providing opportunities to explore  
56 the impact of scale and the distances over which each built environment feature impacts different health  
57 outcomes, and any variation in associations across and within life stages. An important aspect of data  
58 linkage studies is the strong collaborative partnerships. For the LCBEH project, collaborative efforts  
59  
60

1  
2  
3 from the Department of Health of Western Australia, organisations that provided GIS data, and CBEH  
4 were required. This study would not have been feasible without such collaboration.  
5

6 Despite the strengths, the study has limitations worth considering. The use of existing data presents its own  
7 constraints. In built environment and health literature, there is an increasing importance on using  
8 context- and behaviour-specific measures [36]. Using existing data is limited in that the researcher is  
9 restricted to pre-constructed measures that may not be specific for the outcome/s of interest. For  
10 example, the survey measured general health behaviour and thus is not purpose-designed for studies of the  
11 built environment and health. Variables required to examine a multi-level ecological framework that  
12 explores the influence of individual, social, and perceived environmental factors [52] on health outcomes  
13 were not included in the questionnaire. Second, due to the project's cross-sectional design, causality  
14 cannot be assumed. In addition, the computation of a comprehensive set of environment and destination  
15 measures using GIS is time-consuming and labor intensive, particularly for a large population over a wide  
16 geographic area. Moreover, while objective built environment measures provide potentially unbiased data,  
17 the data used (e.g., sources of destinations) were not designed for research purposes. They may be  
18 inaccurate or incomplete. For example, GIS data may not accurately represent what is actually present in the  
19 environment and was not evaluated for accuracy, which is a limitation [47]. This measurement error may  
20 impact on the interpretation of results. Moreover, although we have attempted to use GIS data matched as  
21 closely as possible to the survey data, the years for which the datasets were obtained may not exactly match  
22 the year the participant completed the survey. Nevertheless, the datasets provide a source of objective  
23 measurement for the built environment, and the most temporally relevant source was used.  
24

## 25 **Conclusion**

26  
27 The Life Course Built Environment and Health project will enable investigation of variations in associations  
28 between the built environment, health behaviours, and objectively-measured health outcomes *within* and  
29 *across* different life stages for a large study population. It has the potential to explain apparently inconsistent  
30 findings evident in the literature in studies of people of different age groups. Comparisons across various  
31 age groups are required to build an evidence base for designing healthy neighbourhoods that cater for  
32 children through to older adults.  
33

## 34 **ACKNOWLEDGEMENTS**

35  
36 The Department of Health of Western Australia, and WA Data Linkage Branch is gratefully  
37 acknowledged for providing, and extracting HWSS, HMDS, and MH data. Spatial data based on  
38 information provided by and with the permission of the ©Western Australian Land Information  
39 Authority (i.e., Landgate) was used. Sensis Pty Ltd provided access to destination data obtained from  
40 its Yellow Pages database. Nick Middleton is gratefully acknowledged for his role in developing GIS  
41 scripts used for analyses, and processing GIS measures in 2010 and 2011. LW is supported by a  
42 Healthway Health Promotion Research Fellowship (#20693); HC by a National Health and Medical  
43 Research Council (NHMRC)/National Heart Foundation Early Career Fellowship (#1036350); SF by  
44 a Healthway Health Promotion Research Fellowship (#21363); SH and BB by NHMRC Population  
45 Health Capacity Building Grant (#458668). BGC is supported by a NHMRC Principal Research  
46 Fellow Award (#1004900).  
47  
48  
49  
50

## 51 **COMPETING INTERESTS**

52  
53 The authors declare that they have no competing interests.  
54  
55  
56  
57  
58  
59  
60



**FUNDING**

This project was supported by the Western Australian Health Promotion Foundation i.e., Healthway (#18922).

**CONTRIBUTORS**

KV developed the first draft of the manuscript. MK, FB, BGC, LW, HC, SF and DS contributed to the conception and design of the study. GP contributed to project coordination, data linkage, and data cleaning. BJB, SH and BB provided GIS assistance, and computed the GIS measures. SJ de-identified and extracted the data in preparation for data linkage. All authors provided critical feedback during manuscript development. Each author has approved the final manuscript.

For peer review only

## REFERENCES

1. Brown SC, Mason CA, Lombard JL, et al. The relationship of built environment to perceived social support and psychological distress in Hispanic elders: The role of “eyes on the street”. *J Gerontol B Psychol Sci Soc Sci.* 2009;64(2):234.
2. Titze S, Giles-Corti B, Knuiman M, et al. Associations Between Intrapersonal and Neighborhood Environmental Characteristics and Cycling for Transport and Recreation in Adults: Baseline Results From the RESIDE Study. *J Phys Act Health.* 2010;7:423-31.
3. Transportation Research Board. Does the built environment influence physical activity? Examining the evidence. Washinton, DC: TRB2005.
4. Frank L, Engelke PO, Schmid TL. Health and community design: the impact of the built environment on physical activity. Washington, DC: Island Press; 2003.
5. Doyle S, Kelly-Schwartz A, Schlossberg M, et al. Active Community Environments and Health: The Relationship of Walkable and Safe Communities to Individual Health. *J Am Plann Assoc.* 2006;72(1):19 - 31.
6. Saelens BE, Sallis JF, Frank LD. Environmental Correlates of Walking and Cycling: Findings From the Transportation, Urban Design, and Planning Literatures. *Ann Behav Med.* 2003;25(2):80.
7. Giles-Corti B, Broomhall M, H. , Knuiman M, et al. Increasing walking: How important is distance to, attractiveness, and size of public open space? *Am J Prev Med.* 2005;28(2):169-76.
8. Giles-Corti B, Donovan RJ. The relative influence of individual, social and physical environment determinants of physical activity. *Soc Sci Med.* 2002;54:1793 - 812.
9. Owen N, Humpel N, Leslie E, et al. Understanding environmental influences on walking: Review and research agenda. *Am J Prev Med.* 2004;27(1):67-76.
10. Ellaway A, Macintyre S, Bonnefoy X. Graffiti, greenery, and obesity in adults: secondary analysis of European cross sectional survey. *BMJ.* 2005 Sep 17;331(7517):611-2.
11. Pereira G, Foster S, Martin K, et al. The association between neighborhood greenness and cardiovascular disease: an observational study. *BMC Public Health.* 2012;12:466.
12. Foster S, Giles-Corti B, Knuiman M. Neighbourhood design and fear of crime: A social-ecological examination of the correlates of residents' fear in new suburban housing developments. *Health Place.* 2010;16(6):1156-65.
13. Wood L, Shannon T, Bulsara M, et al. The anatomy of the safe and social suburb: an exploratory study of the built environment, social capital and residents' perceptions of safety. *Health Place.* 2008 Mar;14(1):15-31.

14. Franco OH, de Laet C, Peeters A, et al. Effects of Physical Activity on Life Expectancy With Cardiovascular Disease. *Arch Intern Med.* 2005 November 14, 2005;165(20):2355-60.
15. Laaksonen DE, Lindstrom J, Lakka TA, et al. Physical Activity in the Prevention of Type 2 Diabetes: The Finnish Diabetes Prevention Study. *Diabetes.* 2005 January 1, 2005;54(1):158-65.
16. LaMonte MJ, Blair SN, Church TS. Physical activity and diabetes prevention. *J Appl Physiol.* 2005 September 1, 2005;99(3):1205-13.
17. Haskell WL, Lee IM, Pate RR, et al. Physical Activity and Public Health: Updated Recommendation for Adults From the American College of Sports Medicine and the American Heart Association. *Circulation.* 2007;116(9):1081-93.
18. US Department of Health and Human Services. Physical activity and health: a report of the Surgeon General. Atlanta, Georgia: US Dep. of Health and Human Services, CDC1996.
19. Armstrong T, Bauman A, Davies J. Physical activity patterns of Australian adults. Results of the 1999 National Physical Activity Survey. Canberra: Australian Institute of Health and Welfare2000.
20. Goodwin RD. Association between physical activity and mental disorders among adults in the United States. *Prev Med.* 2003;36(6):698-703.
21. Mason C. Healthy People, Places and Transport. *Health Promot J Austr.* 2000:190-202.
22. Centers for Disease Control and Prevention. Behavioral Risk Factor Surveillance System (BRFSS): Operational and User's Guide. Atlanta: CDC2006.
23. Ewing R, Schmid T, Killingsworth R, et al. Relationship between urban sprawl and physical activity, obesity, and morbidity. *Am J Health Promot.* 2003;18(1):47 - 57.
24. Green C, Hoppa RD, Young TK, et al. Geographic analysis of diabetes prevalence in an urban area. *Soc Sci Med.* 2003;57(3):551-60.
25. Takano T, Nakamura K, Watanabe M. Urban residential environments and senior citizens' longevity in megacity areas: the importance of walkable green spaces. *J Epidemiol Community Health.* 2002 December 1, 2002;56(12):913-8.
26. Schilling J, Giles-Corti B, Sallis J. Connecting Active Living Research and Public Policy: Transdisciplinary Research and Policy Interventions to Increase Physical Activity. *J Public Health Policy.* 2009;30 (Suppl 1):S1-S15.
27. Frank LD, Engelke PO. The Built Environment and Human Activity Patterns: Exploring the Impacts of Urban Form on Public Health. *J Plan Lit.* 2001 November 1, 2001;16(2):202-18.

- 1  
2  
3 28. Papas MA, Alberg AJ, Ewing R, et al. The built environment and obesity. *Epidemiol*  
4 *Rev.* 2007;29(1):129-43.  
5  
6 29. Saelens BE, Handy SL. Built environment correlates of walking: a review. *Med Sci*  
7 *Sports Exerc.* 2008;40(7 Suppl):S550.  
8  
9 30. Giles-Corti B, Wood G, Pikora T, et al. School site and the potential to walk to  
10 school: The impact of street connectivity and traffic exposure in school neighborhoods *Health*  
11 *Place.* 2011;17:545-50.  
12  
13 31. Timperio A, Ball K, Salmon J, et al. Personal, Family, Social, and Environmental  
14 Correlates of Active Commuting to School. *Am J Prev Med.* 2006;30(1):45-51.  
15  
16 32. Wood L, Walker N, I'Anson K, Ivery P, French S, Giles-Corti B. PARKS: Parks and  
17 Reserves Kwinana Study: The use and role of parks within the Town of Kwinana. Perth: The  
18 Centre for the Built Environment and Health, The University of Western Australia 2008.  
19  
20 33. Hooper P, Foster S, Nathan A, et al. Built Environmental Supports for Walking. In:  
21 Ainsworth B, Macera C, editors. *Physical Activity and Public Health Practice.* Boca Raton,  
22 FL: CRC Press (Taylor and Francis Group, LLC); 2012.  
23  
24 34. Learnihan V, Van Niel K, Giles-Corti B, et al. Effect of Scale on the Links between  
25 Walking and Urban Design. *Geographical Research.* 2011;49(2):183-91.  
26  
27 35. Timperio A, Crawford D, Telford A, et al. Perceptions about the local neighborhood  
28 and walking and cycling among children. *Prev Med.* 2004;38(1):39-47.  
29  
30 36. Giles-Corti B, Timperio A, Bull F, et al. Understanding physical activity  
31 environmental correlates: increased specificity for ecological models. *Exerc Sport Sci Rev.*  
32 2005;33(4):175-81.  
33  
34 37. Holman C, Bass A. Population-based linkage of health records in Western Australia:  
35 development of a health services research linked database. *Aust N Z J Public Health.*  
36 1999;23(5):453-9.  
37  
38 38. Australian Bureau of Statistics. National Regional Profile: Perth (Statistical Division).  
39 Perth, Western Australia 2010 [updated 1 November 2011]; Available  
40 from:  
41 <http://www.abs.gov.au/AUSSTATS/abs@nrrp.nsf/Latestproducts/505Population/People12006-2010?opendocument&tabname=Summary&prodno=505&issue=2006-2010>.  
42  
43 39. Department of Health of Western Australia. The WA Health and Wellbeing  
44 Surveillance System (WAHWSS): Design and Methodology Technical Paper Series No 1,  
45 Version 2. Perth, Western Australia, Health Survey Unit EBPHD;2011.  
46  
47 40. Department of Health of Western Australia. Hospital Morbidity Data System:  
48 Reference Manual. Perth, Western Australia, Inpatient Data Collections DID, Performance  
49 Activity and Reporting Division;2011.  
50  
51  
52  
53  
54  
55  
56  
57  
58  
59  
60

- 1  
2  
3 41. World Health Organization. ICD-10 Version: International Statistical Classification of  
4 Diseases and Related Health Problems 10th Revision. 2010 [May 20 2012]; Available from:  
5 <http://apps.who.int/classifications/icd10/browse/2010/en>.  
6
- 7 42. Oliver L, Schuurman N, Hall A. Comparing circular and network buffers to examine  
8 the influence of land use on walking for leisure and errands. *Int J Health Geogr*.  
9 2007;6(1):41.  
10
- 11 43. US Department of Health and Human Services. Physical Activity Guidelines for  
12 Americans, Be active, healthy, and happy. Washington DC: United States Department of  
13 Health and Human Services. 2008.  
14
- 15 44. Harten N, Olds T. Patterns of active transport in 11-12 year old Australian children.  
16 *Aust N Z J Public Health*. 2004;28(2):167-72.  
17
- 18 45. McDonald NC, Alborg AE. Why Parents Drive Children to School: Implications for  
19 Safe Routes to School Programs. *J Am Plann Assoc*. [Article]. 2009;75(3):331-42.  
20
- 21 46. Python Software Foundation. Python v2.6. Python. Wolfeboro Falls, NH, USA2008.  
22
- 23 47. Christian H, Bull F, Middleton N, Knuiman M, Divitini M, Hooper P, et al. How  
24 important is the land use mix measure in understanding walking behaviour? Results from the  
25 RESIDE study. *Int J Behav Nutr Phys Act*. 2011;8:55-67.  
26
- 27 48. Main Roads Western Australia. Functional Road Hierarchy.  
28 [http://www2mainroadswagovau/NR/rdonlyres/7DE6FC8F-A376-49FE-9B99-  
29 11BA1F5B3D54/442/frh\\_criteria3pdf](http://www2mainroadswagovau/NR/rdonlyres/7DE6FC8F-A376-49FE-9B99-11BA1F5B3D54/442/frh_criteria3pdf). 2007.  
30
- 31 49. Lillesand TM, Kiefer RW, Chipman JW, editors. Remote sensing and image  
32 interpretation. 5th edition ed. New Jersey: Wiley; 2004.  
33
- 34 50. Commonwealth of Australia Geoscience Australia. Digital Elevation Model (DEM).  
35 Canberra, Australian Capital Territory. 2010.  
36
- 37 51. Broomhall M, Giles-Corti B, Lange A. Quality of Public Open Space Tool (POST).  
38 Perth, Western Australia: School of Population Health, The University of Western  
39 Australia.2004.  
40
- 41 52. Sallis JF, Cervero RB, Ascher W, et al. An ecological approach to creating active  
42 living communities. *Annu Rev Public Health*. 2006;27:297-322.  
43  
44  
45  
46  
47  
48  
49  
50  
51  
52  
53  
54  
55  
56  
57  
58  
59  
60

1  
2  
3  
4  
5  
6  
7  
8  
9  
10  
11  
12  
13  
14  
15  
16  
17  
18  
19  
20  
21  
22  
23  
24  
25  
26  
27  
28  
29  
30  
31  
32  
33  
34  
35  
36  
37  
38  
39  
40  
41  
42  
43  
44  
45  
46  
47  
48  
49  
50  
51  
52  
53  
54  
55  
56  
57  
58  
59  
60

Figure 1. LCBEH project theoretical framework

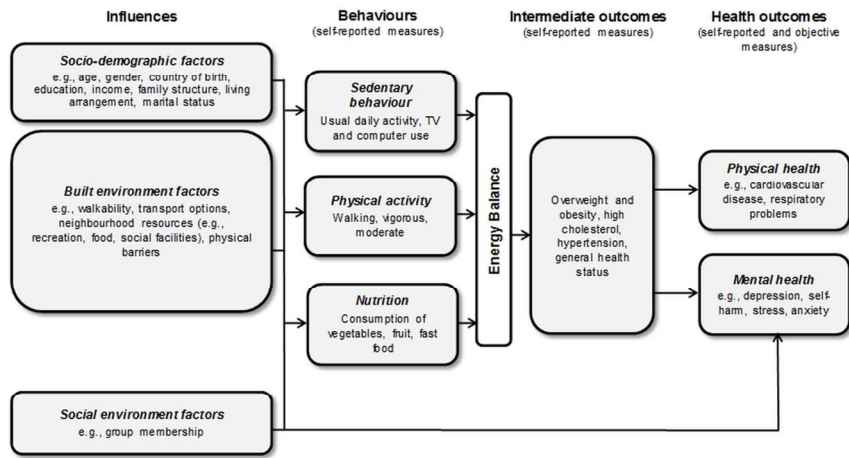

141x90mm (300 x 300 DPI)

review only

1  
2  
3  
4  
5  
6  
7  
8  
9  
10  
11  
12  
13  
14  
15  
16  
17  
18  
19  
20  
21  
22  
23  
24  
25  
26  
27  
28  
29  
30  
31  
32  
33  
34  
35  
36  
37  
38  
39  
40  
41  
42  
43  
44  
45  
46  
47  
48  
49  
50  
51  
52  
53  
54  
55  
56  
57  
58  
59  
60

**Figure 2. Sources of data used for the Life Course Built Environment and Health project**

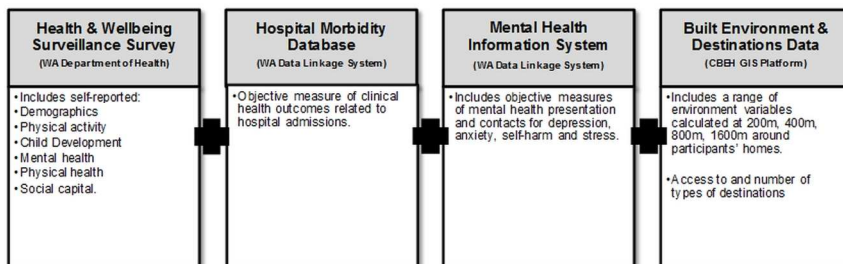

\*Centre for the Built Environment and Health (CBEH), The University of Western Australia (UWA), Perth, WA.

171x90mm (300 x 300 DPI)

For peer review only
